# Supplementary material
Source: HighWire-hosted journal article supplement (https://erj.ersjournals.com/content/60/1/2101674)
Supplement: inline-supplementary-material-1 [file inline-supplementary-material-1.pdf]

## ONLINE SUPPLEMENTARY DATA

# Prognostic phenotypes of early-stage lung adenocarcinoma

Anne-Sophie Lamort, Jan Christian Kaiser, Mario A.A. Pepe, Ioannis Lilis, Giannoula Ntaliarda, Kalman Somogyi, Magda Spella, Sabine J. Behrend, Georgia A. Giotopoulou, Willem Kujawa, Michael Lindner, Ina Koch, Rudolf A. Hatz, Juergen Behr, Rocio Sotillo, Andrea C. Schamberger, and Georgios T. Stathopoulos

## TABLE OF CONTENTS

|                              | <b>Page</b> |
|------------------------------|-------------|
| <b>Supplementary Tables</b>  | 2           |
| <b>Supplementary Figures</b> | 5           |

## SUPPLEMENTARY TABLES

**Supplementary Table E1.** Comparison of the patients selected for the present study with the originating cohort.

|                       | <b>All patients (n = 366)</b> |            | <b>Selected patients (n = 200)</b> |            | <b>Probability</b><br>$\chi^2$ test |
|-----------------------|-------------------------------|------------|------------------------------------|------------|-------------------------------------|
|                       | Patients                      | Percentage | Patients                           | Percentage |                                     |
| <b>Smoking status</b> |                               |            |                                    |            |                                     |
| Never                 | 75                            | 20         | 43                                 | 21         | 0.8850                              |
| Former                | 130                           | 36         | 67                                 | 34         |                                     |
| Current               | 161                           | 44         | 90                                 | 45         |                                     |
| <b>Age</b>            |                               |            |                                    |            |                                     |
| < 45 years            | 11                            | 3          | 7                                  | 3          | 0.9434                              |
| 45 – 65 years         | 160                           | 44         | 88                                 | 44         |                                     |
| > 65 years            | 195                           | 53         | 105                                | 53         |                                     |
| <b>Sex</b>            |                               |            |                                    |            |                                     |
| Female                | 181                           | 49         | 98                                 | 49         | 0.9301                              |
| Male                  | 185                           | 51         | 102                                | 51         |                                     |
| <b>Tumor location</b> |                               |            |                                    |            |                                     |
| Right lung            | 163                           | 45         | 98                                 | 49         | 0.1723                              |
| Left lung             | 133                           | 36         | 76                                 | 38         |                                     |
| Other                 | 70                            | 19         | 26                                 | 13         |                                     |
| <b>pTNM7 stage</b>    |                               |            |                                    |            |                                     |
| Ia                    | 78                            | 21         | 42                                 | 21         | 0.4335                              |
| Ib                    | 60                            | 16         | 43                                 | 21         |                                     |
| IIa                   | 54                            | 15         | 25                                 | 13         |                                     |
| IIb                   | 36                            | 10         | 17                                 | 9          |                                     |
| IIIa                  | 97                            | 26         | 59                                 | 29         |                                     |
| IIIb                  | 10                            | 3          | 5                                  | 3          |                                     |
| IV                    | 31                            | 9          | 9                                  | 4          |                                     |
| <b>Histology</b>      |                               |            |                                    |            |                                     |
| Lepidic               | 16                            | 4          | 7                                  | 4          | 0.9841                              |
| Acinar                | 14                            | 39         | 75                                 | 37         |                                     |
| Papillary             | 70                            | 19         | 39                                 | 19         |                                     |
| Solid                 | 126                           | 34         | 72                                 | 36         |                                     |
| Other                 | 13                            | 4          | 7                                  | 4          |                                     |

**Supplementary Table E2.** Antibodies used in the present study.

| Target                                   | Host   | Provider                             | RRID        | Dilution | Conjugate              | Incubation       |
|------------------------------------------|--------|--------------------------------------|-------------|----------|------------------------|------------------|
| <b>Primary</b>                           |        |                                      |             |          |                        |                  |
| Proliferating cell nuclear antigen, PCNA | Rabbit | Sigma-Aldrich, St. Louis, MO         | AB_1855078  | 1:100    | -                      | 2h00 – 37°C      |
| Tumor protein 53, TP53                   | Mouse  | Thermo Fisher, Waltham, MA           | AB_10989883 | 1:100    | -                      | overnight– 4°C   |
| Cluster of differentiation 45, CD45      | Rabbit | Thermo Fisher, Waltham, MA           | AB_2174009  | 1:250    | -                      | overnight – 4°C  |
| Anti-hemophillic factor VIII, FVIII      | Sheep  | Thermo Fisher, Waltham, MA           | AB_2262541  | 1:500    | -                      | 2h00 – 20°C      |
| Neurofibromin 1, NF1                     | Rabbit | Thermo Fisher, Waltham, MA           | AB_2149657  | 1:500    | -                      | overnight – 20°C |
| Programmed cell death-1, PD-1            | Mouse  | Elabscience, Houston, TX             | AB_2891227  | 1:100    | -                      | overnight– 4°C   |
| <b>Secondary</b>                         |        |                                      |             |          |                        |                  |
| Mouse IgG/IgM                            | Goat   | Jackson, Cambridge, UK               | AB_2338505  | 1:1000   | horseradish peroxidase | 1h30 – 20°C      |
| Rabbit IgG                               | Mouse  | Abcam, London, UK                    | AB_2650595  | 1:5000   | horseradish peroxidase | 1h30 – 20°C      |
| Goat IgG with Sheep reactivity           | Mouse  | Santa Cruz Biotechnology, Dallas, TX | AB_628490   | 1:50     | horseradish peroxidase | 1h00 – 20°C      |

RRID, research reagent identification.

Ig, Immunoglobulin.

**Supplementary Table E3.** Raw data obtained from 200 resected lung adenocarcinoma donors.

Provided as a separate \*.xlsx file. Clinical and molecular variables (color-coded columns) of 200 lung adenocarcinoma donors where each row represents a patient. pTNM7, pathological tumor-node-metastasis staging system seventh edition; STAS, spread through the airspaces; TP53, tumor protein 53; CD45, cluster of differentiation 45; PCNA, proliferating cell nuclear antigen; TUNEL, terminal deoxynucleotidyl transferase dUTP nick-end labeling; FVIII, coagulation factor VIII; NF1, neurofibromatosis 1; PD-1, Programmed cell death protein 1; KRAS, KRAS proto-oncogene, GTPase; EGFR, epidermal growth factor receptor; numbers 0–4, semi-quantitative immunohistochemistry scores; LADERS<sub>CLIN</sub>, clinical LUAD death score; LADERS<sub>IMM</sub>, immunophenotypic score.

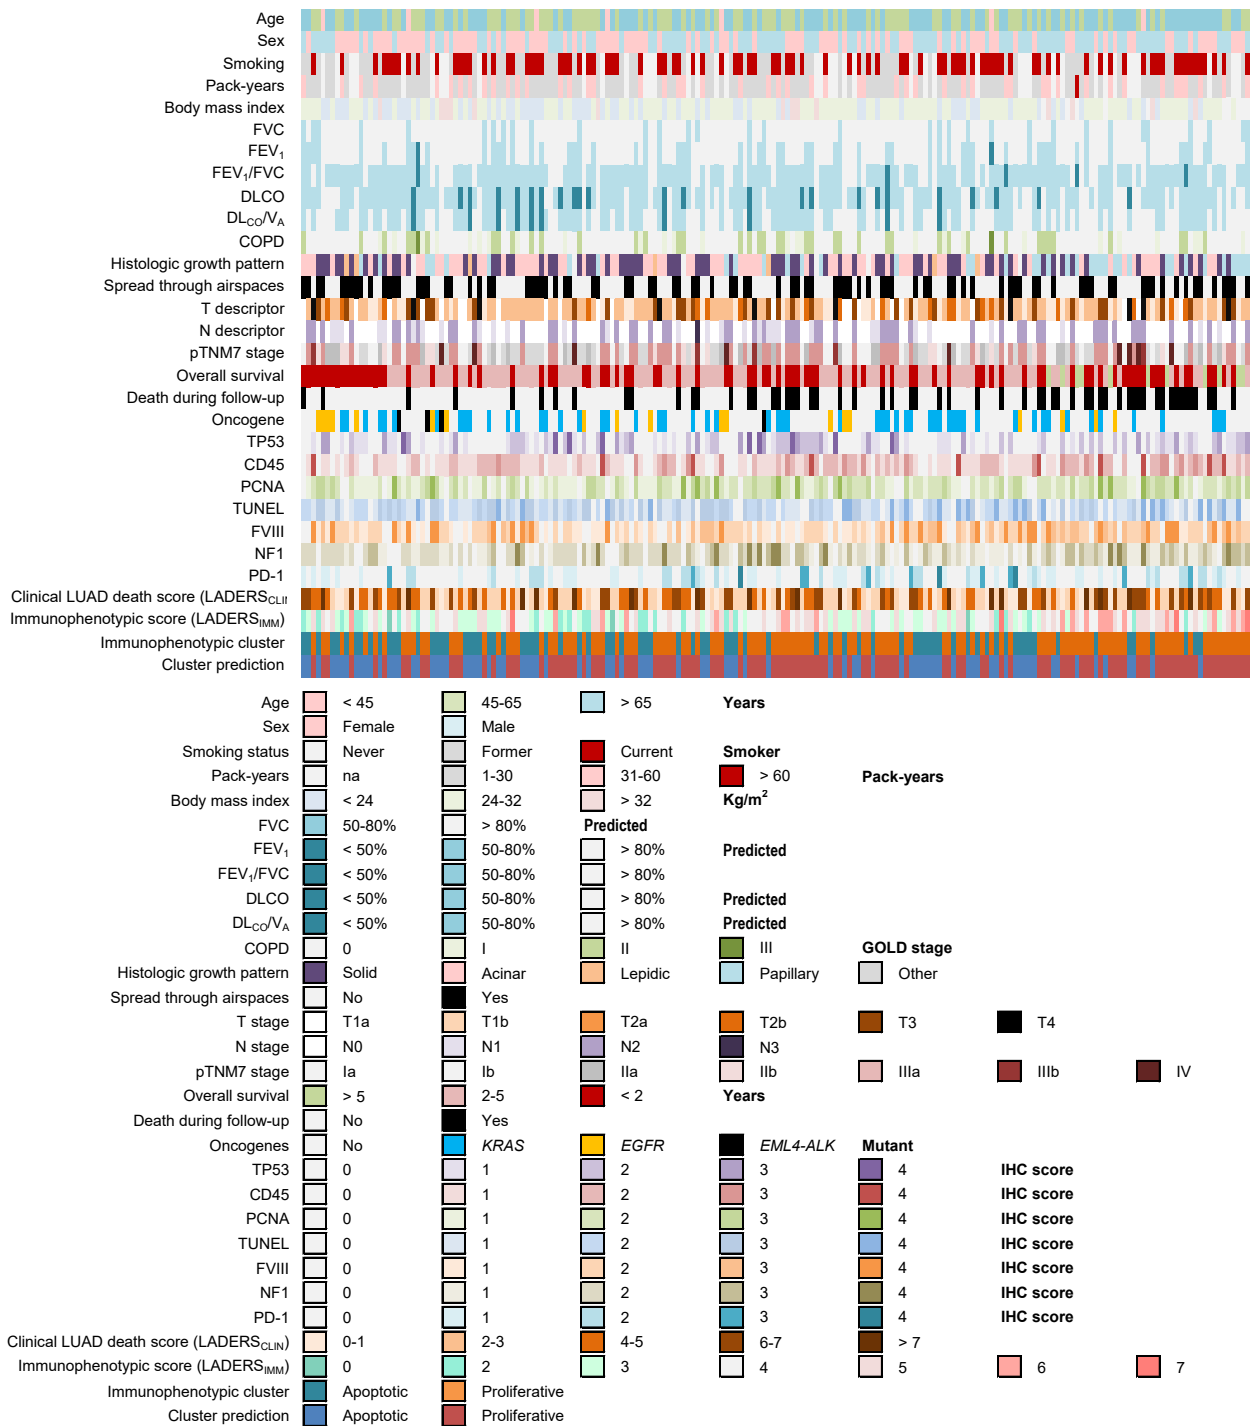

**Supplementary Figure E1. Main findings of the study.** Color-coded clinical and molecular variables (columns) of 200 lung adenocarcinoma donors where each column represents a patient. pTNM7, pathological tumour-node-metastasis staging system seventh edition; TP53, tumour protein 53; CD45, cluster of differentiation 45; PCNA, proliferating cell nuclear antigen; TUNEL, terminal deoxynucleotidyltransferase dUTP nick-end labelling; FVIII, coagulation factor VIII; NF1, neurofibromatosis 1; PD-1, Programmed cell death protein 1; *KRAS*, *KRAS* proto-oncogene, GTPase; *EGFR*, epidermal growth factor receptor; numbers 0–4, semi-quantitative immunohistochemistry scores; LADERS<sub>CLIN</sub>, clinical LUAD death score; LADERS<sub>IMM</sub>, immunophenotypic score.

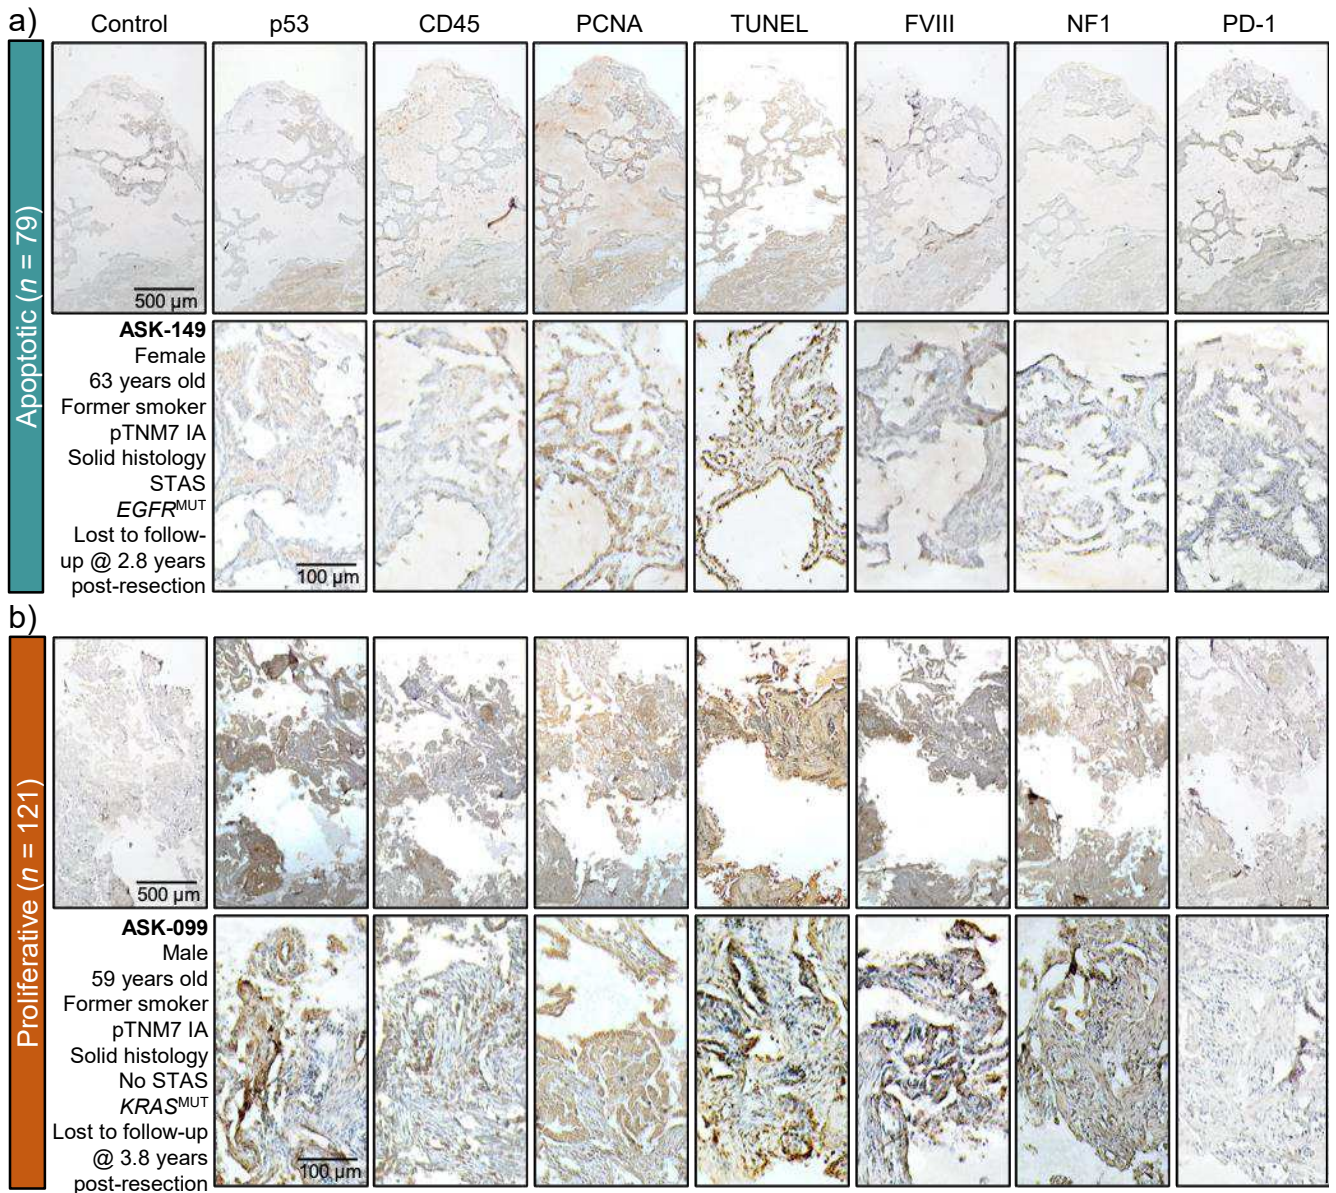

**Supplementary Figure E2. Representative patients' immunoreactivity.** Shown are representative immunohistochemistry microphotographs of one patient from each immunophenotype.

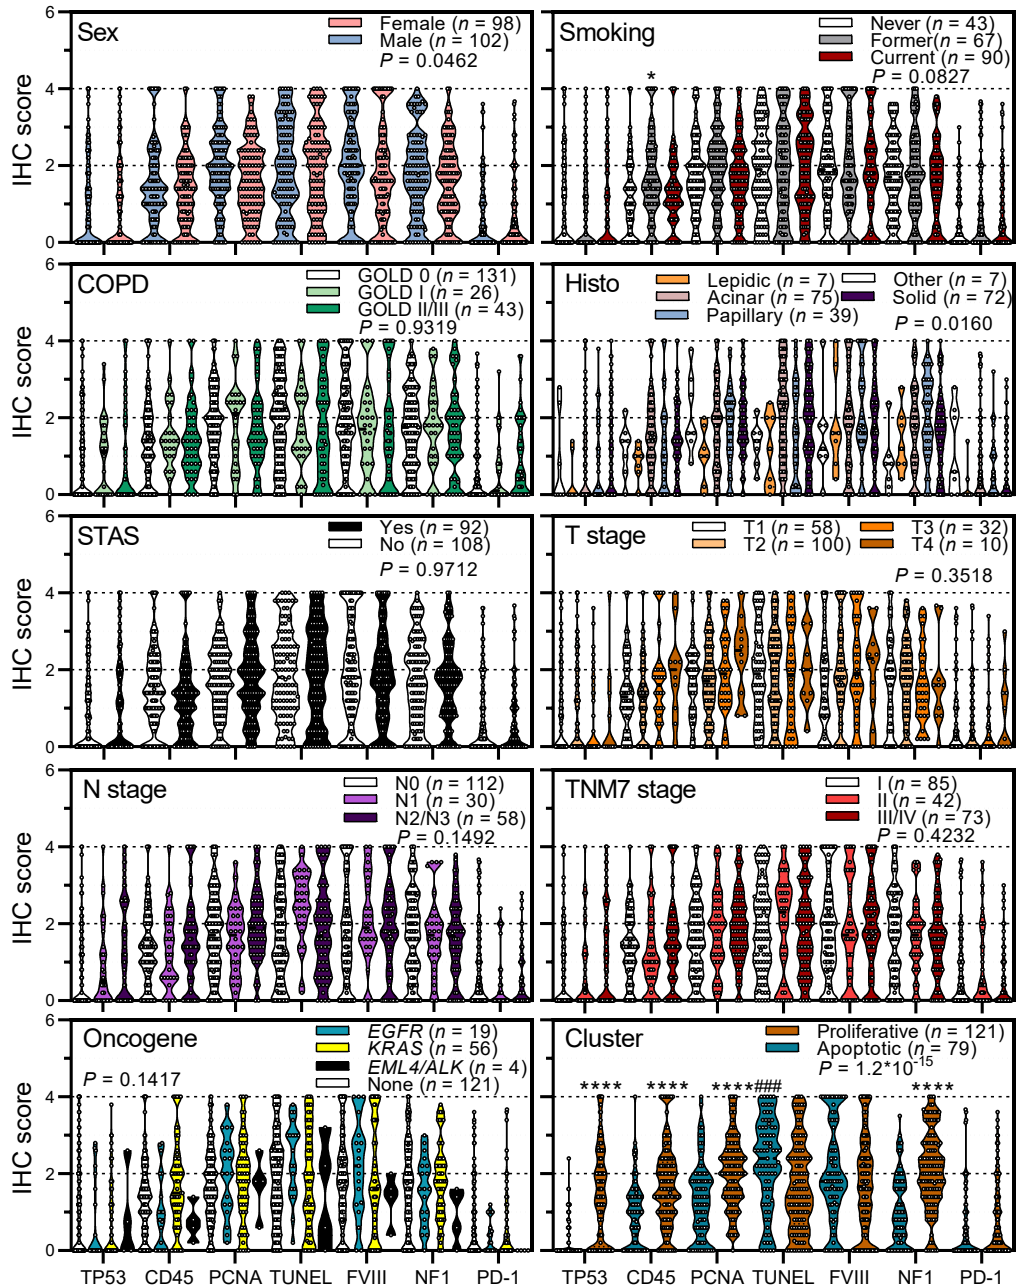

**Supplementary Figure E3. Immunoreactivity of early-stage LUAD for seven cancer hallmarks.** Immunoreactivity scores of tumour tissues of  $n = 200$  patients with LUAD for seven cancer hallmarks stratified by clinicopathologic features shows phenotypic cluster to be the main defining factor of hallmark expression. Data are shown as patient numbers ( $n$ ), raw data points (circles), rotated kernel density distributions (violins), medians (dashed lines), quartiles (dotted lines), and  $P$ , 2-way ANOVA probability values ( $P$ ). \*,  $P < 0.05$  for comparison between former and never-smokers; \*\*\*,  $P < 0.0001$  for comparison between proliferative over never-smokers; ###,  $P < 0.001$  for comparison between apoptotic over proliferative patients; ####,  $P < 0.0001$  for comparison between apoptotic over proliferative patients; Sidak's post-test. TP53, tumour protein 53; CD45, cluster of differentiation 45; PCNA, proliferating cell nuclear antigen; TUNEL, terminal deoxynucleotidyl nick-end labelling; FVIII, anti-hemophilic factor; NF1, neurofibromatosis 1; PD-1, programmed cell death-1.

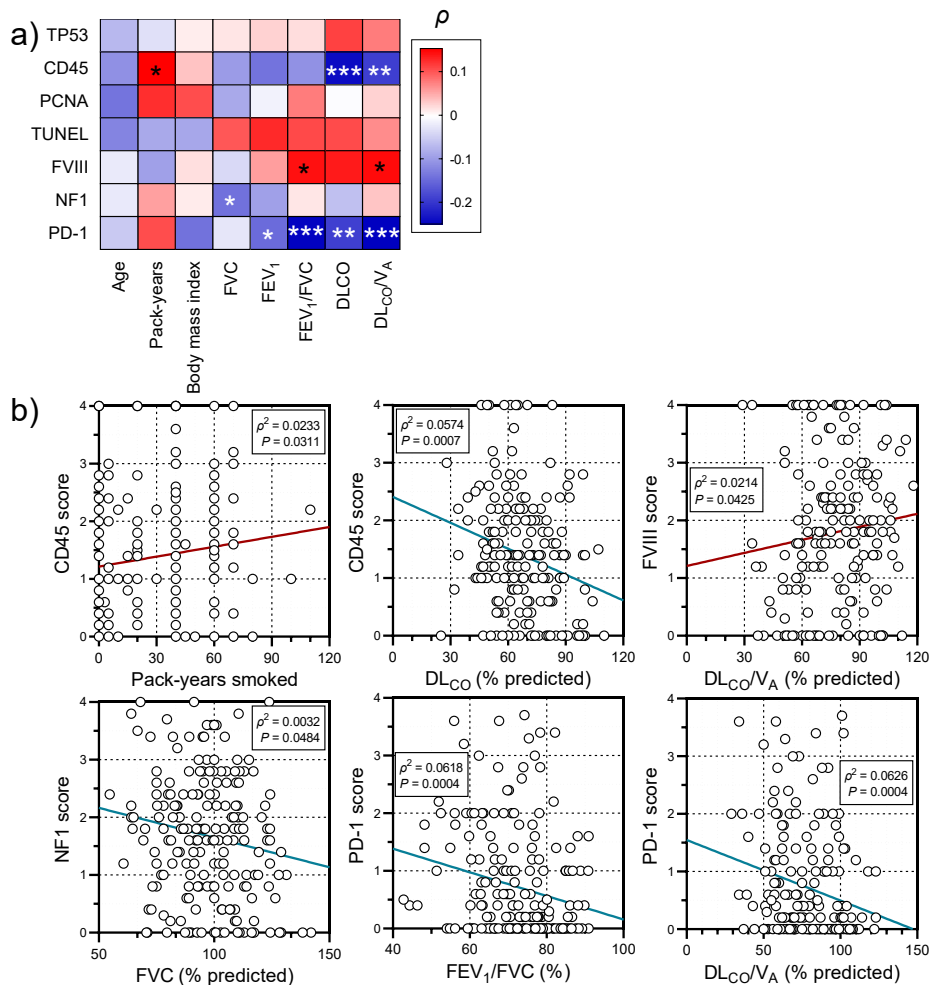

**Supplementary Figure E4. Correlations between clinical variables and immunoreactivity of early-stage LUAD for seven cancer hallmarks.** Immunoreactivity scores of tumor tissues of  $n = 200$  patients with LUAD for seven cancer hallmarks were determined and were correlated with clinical and laboratory features. Data in **a)** are shown as heatmap of Spearman's correlation coefficients ( $\rho$ ). \*, \*\*, and \*\*\*,  $P < 0.05$ ,  $P < 0.01$ , and  $P < 0.001$ , respectively, Spearman's correlation. Data in **b)** are shown as raw data points (circles), linear regression lines (coloured lines), and squared Spearman's correlation coefficients ( $\rho^2$ ) and probabilities ( $P$ ) of some representative correlations. TP53, tumour protein 53; CD45, cluster of differentiation 45; PCNA, proliferating cell nuclear antigen; TUNEL, terminal deoxynucleotidyl nick-end labelling; FVIII, anti-hemophilic factor; NF1, neurofibromatosis 1; PD-1, programmed cell death-1.



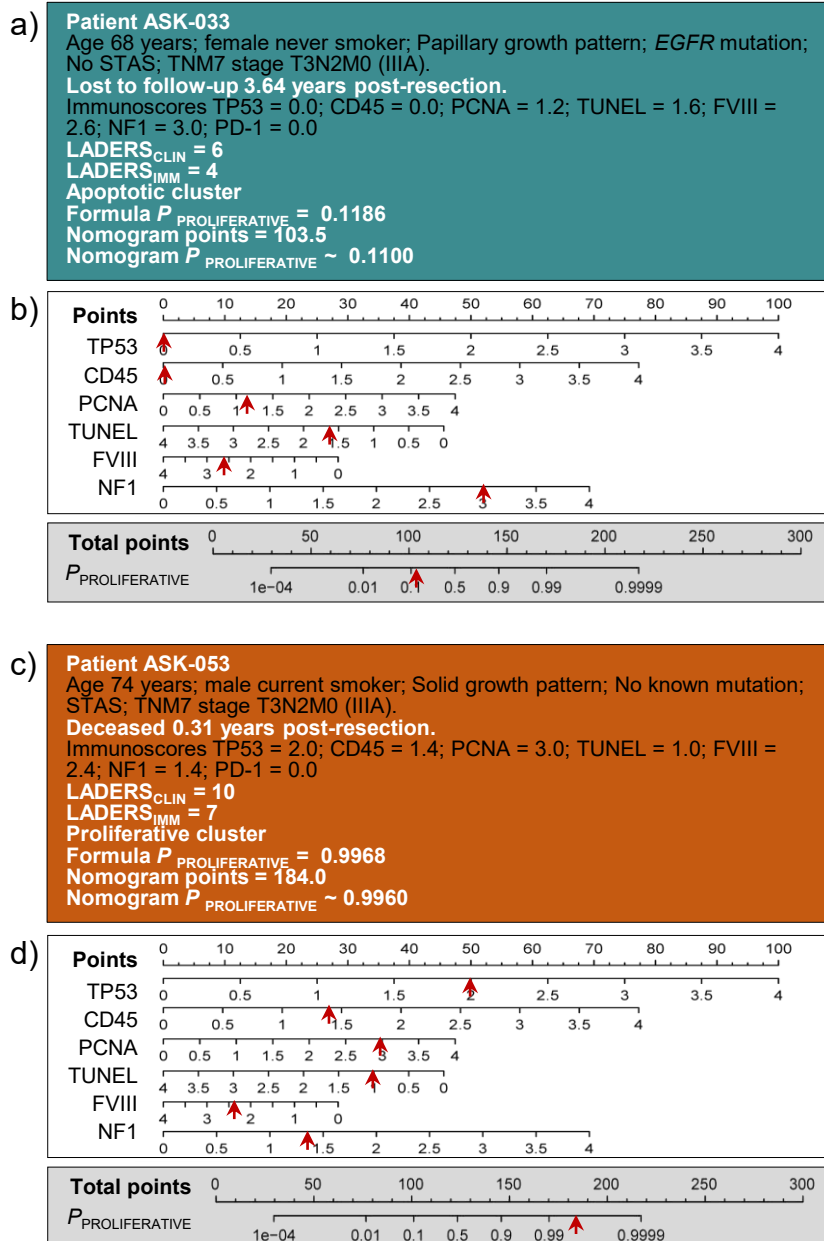

**Supplementary Figure E5. Exemplary patient cluster prediction using the formula and nomogram provided. a, c)** Clinical and immunoreactivity features, clinical (LADERS<sub>CLIN</sub>) and immunoreactivity (LADERS<sub>IMM</sub>) risk scores and probability of belonging to the proliferative phenotype ( $P_{\text{PROLIFERATIVE}}$ ) of two representative patients, as derived from the formula and the nomogram using a cut-off of  $P_{\text{PROLIFERATIVE}} > 0.538$ . **b, d)** Exemplary uses of the nomogram with red arrows in white boxes indicating individual hallmark scores corresponding to points and red arrows in grey boxes indicating total hallmark scores corresponding to  $P_{\text{PROLIFERATIVE}}$ : TP53, tumour protein 53; CD45, cluster of differentiation 45; PCNA, proliferating cell nuclear antigen; TUNEL, terminal deoxynucleotidyl nick-end labelling; FVIII, anti-hemophilic factor; NF1, neurofibromatosis 1; PD-1, programmed cell death-1; LADERS<sub>CLIN</sub>, clinical LUAD death score; LADERS<sub>IMM</sub>, immunophenotypic score..
