# Supplementary material
Source: HighWire-hosted journal article supplement (https://erj.ersjournals.com/content/60/1/2101674)
Supplement: inline-supplementary-material-3 [file inline-supplementary-material-3.pdf]

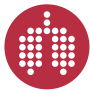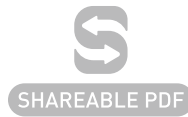

# Prognostic phenotypes of early-stage lung adenocarcinoma

Anne-Sophie Lamort<sup>1,2,9</sup>, Jan Christian Kaiser<sup>1b3,9</sup>, Mario A.A. Pepe<sup>1,2</sup>, Ioannis Lilis<sup>1b4</sup>,  
Giannoula Ntaliarda<sup>1b4</sup>, Kalman Somogyi<sup>2,5</sup>, Magda Spella<sup>4</sup>, Sabine J. Behrend<sup>1b1,2</sup>,  
Georgia A. Giotopoulou<sup>1,2</sup>, Willem Kujawa<sup>1,2</sup>, Michael Lindner<sup>2,6</sup>, Ina Koch<sup>2,6</sup>, Rudolf A. Hatz<sup>2,6</sup>,  
Juergen Behr<sup>2,7</sup>, Rocio Sotillo<sup>2,5,8</sup>, Andrea C. Schamberger<sup>1,2</sup> and Georgios T. Stathopoulos<sup>1b1,2,9</sup>

<sup>1</sup>Comprehensive Pneumology Center (CPC) and Institute for Lung Biology and Disease (iLBD), Helmholtz Center Munich–German Research Center for Environmental Health (HMGU), Munich, Germany. <sup>2</sup>German Center for Lung Research, Giessen, Germany. <sup>3</sup>Institute of Radiation Medicine (IRM), Helmholtz Center Munich–German Research Center for Environmental Health (HMGU), Neuherberg, Germany. <sup>4</sup>Dept of Physiology, Faculty of Medicine, University of Patras, Rio, Greece. <sup>5</sup>Division of Molecular Thoracic Oncology, German Cancer Research Center (DKFZ), Heidelberg, Germany. <sup>6</sup>Center for Thoracic Surgery Munich, Ludwig Maximilian University of Munich and Asklepios Medical Center, Gauting, Germany. <sup>7</sup>Dept of Medicine V, University Hospital, Ludwig Maximilian University of Munich, Munich, Germany. <sup>8</sup>Translational Lung Research Center Heidelberg (TRL), German Center for Lung Research (DZL), Heidelberg, Germany. <sup>9</sup>These authors contributed equally to this work.

Corresponding author: Georgios T. Stathopoulos ([stathopoulos@helmholtz-muenchen.de](mailto:stathopoulos@helmholtz-muenchen.de))

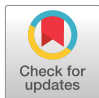

Shareable abstract (@ERSpublications)

**Clinical-grade immunodetection of TP53, NF1, CD45, PD-1, PCNA, TUNEL and FVIII in tumour samples identifies two phenotypes of resected lung adenocarcinomas that display different prognosis and can be used for patient management and trial design** <https://bit.ly/3DpM5Ll>

**Cite this article as:** Lamort A-S, Kaiser JC, Pepe MAA, *et al.* Prognostic phenotypes of early-stage lung adenocarcinoma. *Eur Respir J* 2022; 60: 2101674 [DOI: 10.1183/13993003.01674-2021].

This single-page version can be shared freely online.

Copyright ©The authors 2022.  
For reproduction rights and  
permissions contact  
[permissions@ersnet.org](mailto:permissions@ersnet.org)

This article has an editorial  
commentary:  
[https://doi.org/10.1183/  
13993003.00569-2022](https://doi.org/10.1183/13993003.00569-2022)

Received: 14 June 2021  
Accepted: 11 Nov 2021

## Abstract

**Background** Survival after curative resection of early-stage lung adenocarcinoma (LUAD) varies and prognostic biomarkers are urgently needed.

**Methods** Large-format tissue samples from a prospective cohort of 200 patients with resected LUAD were immunophenotyped for cancer hallmarks TP53, NF1, CD45, PD-1, PCNA, TUNEL and FVIII, and were followed for a median of 2.34 (95% CI 1.71–3.49) years.

**Results** Unsupervised hierarchical clustering revealed two patient subgroups with similar clinicopathological features and genotype, but with markedly different survival: “proliferative” patients (60%) with elevated TP53, NF1, CD45 and PCNA expression had 50% 5-year overall survival, while “apoptotic” patients (40%) with high TUNEL had 70% 5-year survival (hazard ratio 2.23, 95% CI 1.33–3.80;  $p=0.0069$ ). Cox regression and machine learning algorithms including random forests built clinically useful models: a score to predict overall survival and a formula and nomogram to predict tumour phenotype. The distinct LUAD phenotypes were validated in The Cancer Genome Atlas and KMplotter data, and showed prognostic power supplementary to International Association for the Study of Lung Cancer tumour–node–metastasis stage and World Health Organization histologic classification.

**Conclusions** Two molecular subtypes of LUAD exist and their identification provides important prognostic information.
